# Supplementary material for: Calculating the adsorption energy of a charged adsorbent in a periodic metallic system – the case of BH4− hydrolysis on the Ag(111) surface
Source: Royal Society of Chemistry journal article supplement (doi:10.1039/d1cp03895h), 2021-01-01
Supplement: d1cp03895h1.pdf [file d1cp03895h1.pdf]

# Calculating the Adsorption Energy of a Charged Adsorbent in a Periodic Metallic System – The Case of $\text{BH}_4^-$ Hydrolysis on Ag(111) Surface

*Basil Raju Karimadom<sup>§</sup>, Dan Meyerstein<sup>§,#</sup>, Haya Kornweitz<sup>§\*</sup>*

*<sup>§</sup> Chemical Sciences Department, Ariel University, Ariel, Israel, # Chemistry Department, Ben-Gurion University, Beer-Sheva, Israel*

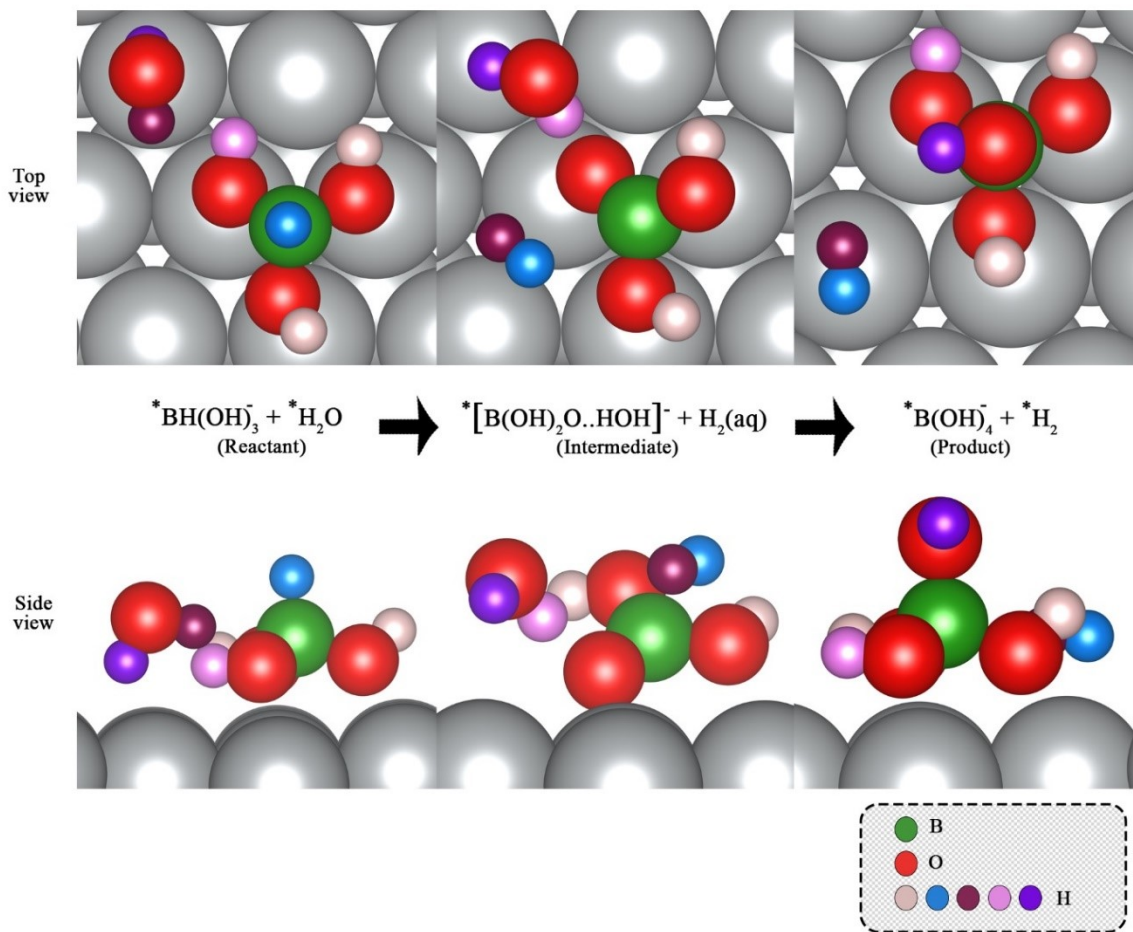

*Figure S1: Reaction mechanism of fourth step (reaction 9).*

### Supplementary Data

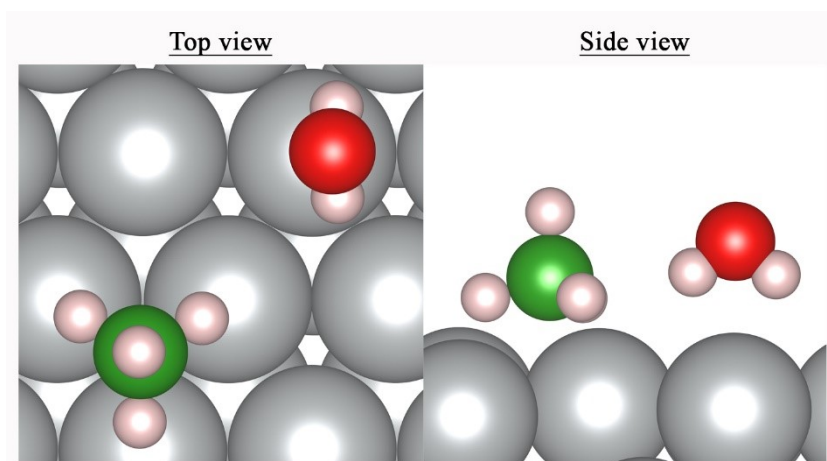

*Figure S2: Co-adsorbed structure of  $\text{H}_2\text{O}$  and  $\text{BH}_4^-$  on  $\text{Ag}(111)$  surface.*

## Catalytic Cycle: Desorption of ions

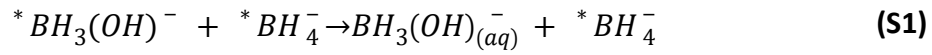

$$\Delta G^0 = -0.39 \text{ eV}$$

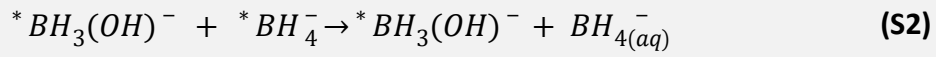

$$\Delta G^0 = -1.10 \text{ eV}$$

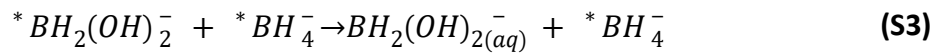

$$\Delta G^0 = -0.67 \text{ eV}$$

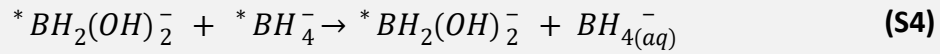

$$\Delta G^0 = -1.23 \text{ eV}$$

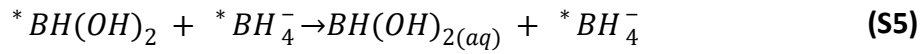

$$\Delta G^0 = 0.26 \text{ eV}$$

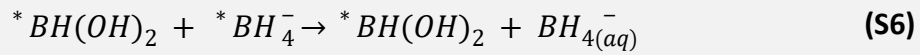

$$\Delta G^0 = 0.48 \text{ eV}$$

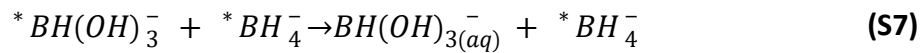

$$\Delta G^0 = -0.58 \text{ eV}$$

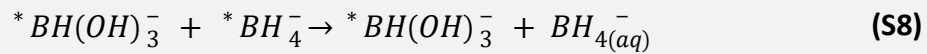

$$\Delta G^0 = -1.13 \text{ eV}$$

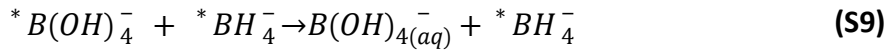

$$\Delta G^0 = -0.56 \text{ eV}$$

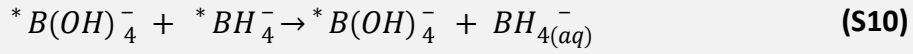

$$\Delta G^0 = -1.05 \text{ eV}$$

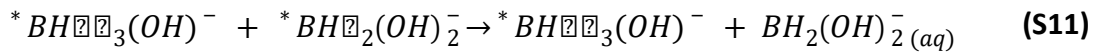

$$\Delta G^0 = -0.700 \text{ eV}$$

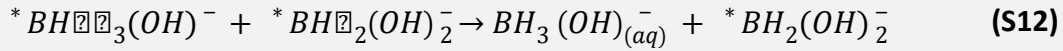

$$\Delta G^0 = -0.468 \text{ eV}$$

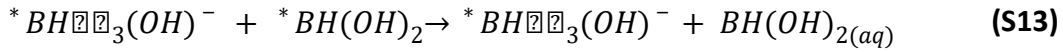

$$\Delta G^0 = 0.429 \text{ eV}$$

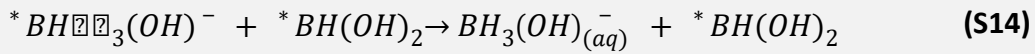

$$\Delta G^0 = 1.33 \text{ eV}$$

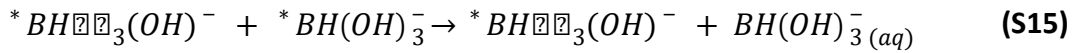

$$\Delta G^0 = -0.386 \text{ eV}$$

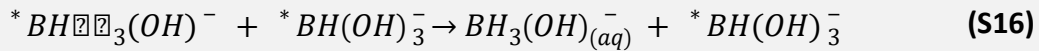

$$\Delta G^0 = -0.212 \text{ eV}$$

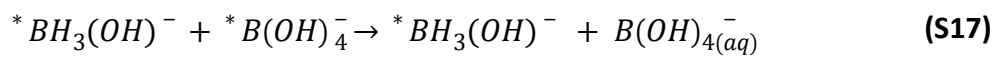

$$\Delta G^0 = -0.63 \text{ eV}$$

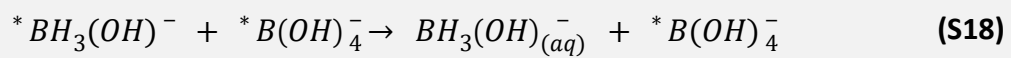

$$\Delta G^0 = -0.40 \text{ eV}$$
